# Supplementary material
Source: publisher site journal article supplement (https://www.dovepress.com/article/477244)
Supplement: Supplementary file 1 [file get_supplementary_file.php]

**Supplementary Table 1.** Immunotherapy for all patients

|  |  | PDMR | NPDMR |
| --- | --- | --- | --- |
|  |  | N (%) | N (%) |
|  | n | 31 | 144 |
| PD-1 | Sintilimab | 15 (48.4) | 53 (36.8) |
| Camrelizumab | 4 (12.9) | 35 (24.3) |
| Tislelizumab | 5 (16.1) | 23 (16.0) |
| Toripalimab | 5 (16.1) | 14 (9.7) |
| Pembrolizumab | 0 (0) | 10 (6.9) |
| Nivolumab | 0 (0) | 4 (2.8) |
| PD-L1 | Durvalumab | 2 (6.5) | 2 (1.4) |
| Atezolizumab | 0 (0) | 3 (2.1) |

**Supplementary Table 2.** Univariate and multivariate analyses of clinical variables on progression-free survival

|  | **Univariate analysis** | | **Multivariate analysis** | |
| --- | --- | --- | --- | --- |
| **Variables** | **HR (95% CI)** | ***P* values** | **HR (95% CI)** | ***P* values** |
| Gender |  |  |  |  |
| Male | 1.59 (1.13-2.24) | 0.008 | 1.54 (1.01-2.37) | 0.024 |
| Female |  |  |  |  |
| ECOG |  |  |  |  |
| <1 | 1.06 (0.78-1.43) | 0.708 |  |  |
| ≥1 |  |  |  |  |
| Age |  |  |  |  |
| <65 | 1.27 (0.94-1.72) | 0.126 |  |  |
| ≥65 |  |  |  |  |
| Tumor site |  |  |  |  |
| Left lung | 1.35 (0.99-1.82) | 0.056 | 1.43 (1.05-1.96) | 0.023 |
| Right lung |  |  |  |  |
| Number of transplanted organs |  |  |  |  |
| ≥3 | 1.20 (0.88-1.64) | 0.244 |  |  |
| <3 |  |  |  |  |
| Cancer stage |  |  |  |  |
| Ⅳ | 1.27 (0.87-1.85) | 0.208 |  |  |
| Ⅲ |  |  |  |  |
| Histologic.type |  |  |  |  |
| LUSC | 1.27 (0.92-1.74) | 0.142 |  |  |
| LUAD |  |  |  |  |
| Brain metastases |  |  |  |  |
| Yes | 1.15 (0.81-1.63) | 0.439 |  |  |
| No |  |  |  |  |
| Liver metastases |  |  |  |  |
| Yes | 1.73 (1.06-2.84) | 0.028 | 1.82 (1.10-2.99) | 0.018 |
| No |  |  |  |  |
| Bone metastases |  |  |  |  |
| Yes | 1.29 (0.95-1.76) | 0.108 |  |  |
| No |  |  |  |  |
| Smoking status |  |  |  |  |
| Smoker | 1.40 (1.03-1.90) | 0.032 | 0.99 (0.66-1.46) | 0.939 |
| Nonsmoker |  |  |  |  |
| Heart disease |  |  |  |  |
| Yes | 0.90 (0.57-1.41) | 0.643 |  |  |
| No |  |  |  |  |
| Diabetes |  |  |  |  |
| Yes | 0.87 (0.57-1.33) | 0.513 |  |  |
| No |  |  |  |  |
| Hypertension |  |  |  |  |
| Yes | 0.80 (0.54-1.16) | 0.237 |  |  |
| No |  |  |  |  |
| Used RT |  |  |  |  |
| Yes | 1.15 (0.83-1.59) | 0.400 |  |  |
| No |  |  |  |  |
| Group |  |  |  |  |
| PDMR | 1.53 (1.04-2.27) | 0.033 | 1.52 (1.03-2.27) | 0.038 |
| PDNMR |  |  |  |  |

HR Hazard ratio, PDMR Progressive disease with mixed responses, PDNMR Progressive disease with none mixed responses, ECOG Eastern Cooperative Oncology Group, LUAD Lung adenocarcinoma, LUSC Lung squamous cell carcinoma, RT Radiation therapy

**Supplementary Table 3.** Baseline characteristics of PDMR patients

|  |  | With ICI  N (%) | Without ICI  N (%) | *P* value |
| --- | --- | --- | --- | --- |
| n |  | 19 | 8 |  |
| Age, median (IQR) |  | 58 (55-65) | 56 (53-63) | 0.522 |
| Gender |  |  |  |  |
| Female |  | 5 (26.3) | 2 (25.0) | 1.000 |
| Male |  | 14 (73.7) | 6 (75.0) |  |
| ECOG |  |  |  |  |
| ≥ 1 |  | 12 (63.2) | 5 (62.5) | 1.000 |
| < 1 |  | 7 (36.8) | 3 (37.5) |  |
| Tumor site |  |  |  |  |
| Left lung |  | 10 (52.6) | 1 (12.5) | 0.090 |
| Right lung |  | 9 (47.4) | 7 (87.5) |  |
| No. of Metastatic organs |  |  |  |  |
| < 3 |  | 10 (52.6) | 1 (12.5) | 0.090 |
| ≥ 3 |  | 9 (47.4) | 7 (87.5) |  |
| Cancer stage |  |  |  |  |
| Ⅲ |  | 1 (5.3) | 0 (0.0) | 1.000 |
| Ⅳ |  | 18 (94.7) | 8 (100.0) |  |
| Histologictype |  |  |  |  |
| LUAD |  | 11 (57.9) | 6 (75.0) | 0.631 |
| LUSC |  | 7 (36.8) | 2 (25.0) |  |
| Others |  | 1 (5.3) | 0 (0.0) |  |
| Brain metastases |  |  |  |  |
| No |  | 15 (79.0) | 4 (50.0) | 0.183 |
| Yes |  | 4 (21.1) | 4 (50.0) |  |
| Hepatic metastases |  |  |  |  |
| No |  | 17 (89.5) | 6 (75.0) | 0.558 |
| Yes |  | 2 (10.5) | 2 (25.0) |  |
| Bone metastasis |  |  |  |  |
| No |  | 13 (68.4) | 2 (25.0) | 0.087 |
| Yes |  | 6 (31.6) | 6 (75.0) |  |
| Smoking |  |  |  |  |
| No |  | 6 (31.6) | 2 (25.0) | 1.000 |
| Yes |  | 13 (68.4) | 6 (75.0) |  |
| Heart Disease |  |  |  |  |
| No |  | 17 (89.5) | 8 (100.0) | 1.000 |
| Yes |  | 2 (10.5) | 0 (0.0) |  |
| Diabetes |  |  |  |  |
| No |  | 16 (84.2) | 8 (100.0) | 0.532 |
| Yes |  | 3 (15.8) | 0 (0.0) |  |
| Hypertension |  |  |  |  |
| No |  | 18 (94.7) | 7 (87.5) | 0.513 |
| Yes |  | 1 (5.3) | 1 (12.5) |  |
| First-line |  |  |  |  |
| No |  | 6 (31.6) | 5 (62.5) | 0.287 |
| Yes |  | 13 (68.4) | 3 (37.5) |  |

PDMR Progressive disease with mixed responses, ICI Continue using ICI after progression, No Not using ICI after progression, ECOG Eastern Cooperative Oncology Group, LUAD Lung adenocarcinoma, LUSC Lung squamous cell carcinoma, RT Radiation therapy
